# Supplementary material
Source: PubMed Central journal article supplement (PMC3935145)
Supplement: supp_113.209767_jpet209767_Supplemental_materials.pdf [file supp_113.209767_jpet209767_Supplemental_materials.pdf]

## Supplemental Materials

Rare human nicotinic acetylcholine receptor alpha 4 subunit (*CHRNA4*) variants affect expression and function of high affinity nicotinic acetylcholine receptors

McClure-Begley, TD, Papke, RL, Stone, KL, Stokes, C, Levy, AD, Gelernter, J, Xie P, Lindstrom J, Picciotto, MR

Journal of Pharmacology and Experimental Therapeutics

## Supplemental Methods

cDNA Preparations:

Mutagenesis primers were:

$\alpha$ 4R336C: 5'-CGCTCGCCATGCACGCACACC-3'

5'-GGTGTGCGTGCATGGCGAGCG-3'

$\alpha$ 4P451L: 5'-CCCTGCCGCCTGCCCCACGGC-3'

5'-GCCGTGGGGCAGGCGGCAGGG-3'

$\alpha$ 4R487Q: 5'-GCCGGTCTCAGAGCATCCAG-3'

5'-CTGGATGCTCTGAGACCGGC-3'.

Top10 competent bacteria were transformed with 1  $\mu$ l of the PCR product and streaked onto LB agar plates supplemented with 100u/ml ampicillin. Individual colonies were picked from the plate and used to inoculate 5 ml cultures of Luria broth (LB) supplemented with 100u/ml ampicillin and grown at 37°C with agitation overnight. A 1 ml aliquot of each culture was used for DNA purification (Qiagen Miniprep). DNA was sequenced (WM Keck Foundation Genomics Services, Yale University School of Medicine) and confirmation of the mutagenesis primer sequence in the proper orientation was performed with 4Peaks ([4peaks.en.softonic.com](http://4peaks.en.softonic.com)) and

BLASTn (blast.ncbi.nlm.nih.gov). For expression studies in HEK293 cells, the  $\alpha 4$  cDNA was excised from psp64 by restriction digestion with BamH1 and HindIII (NEB) and ligated into identical restriction sites in pcDNA3.1 Hygro (Invitrogen) with T4 DNA ligase (Invitrogen). Human  $\beta 2$  cDNA for HEK 293 cell transfection was kindly provided by Dr. Jon Lindstrom (University of Pennsylvania) in a pRc/CMV expression vector (Invitrogen), cloned as described previously (Wang et al, 1998). Verified mutants were amplified by inoculating 400 ml of sterile LB supplemented with 100u/ml ampicillin with 1 ml of the verified culture. cDNA was purified from the large cultures with a Qiagen Endo-free Maxi-prep kit.

### **Cell Culture and Transfection:**

Transient transfections were performed with Lipofectamine 2000 (Invitrogen) according to the manufacturer's instructions. Briefly, cells were plated at an initial density of 50,000/cm<sup>2</sup> in DMEM+10% heat-inactivated fetal bovine serum (FBS), 100u/ml penicillin, 100  $\mu$ g/ml streptomycin, and 0.25  $\mu$ g/ml amphotericin B and maintained at 37°C and 5% CO<sub>2</sub>. Cells were allowed to reach ~90% confluence before transfection (typically ~96 hours). On the day of transfection, media was removed and cells rinsed once with warm DMEM+10% FBS, and covered with fresh DMEM+10% FBS. cDNA was mixed with Lipofectamine 2000 (7  $\mu$ l/ $\mu$ g cDNA) in Optimem (200  $\mu$ l/ $\mu$ g cDNA) and incubated at room temp for 30 min. The Optimem:Lipofectamine:cDNA mixture was gently layered onto the media and cells were returned to the incubator. Cells were harvested 24 hr following transfection.

### **[<sup>3</sup>H]-Epibatidine Binding:**

Cell membranes were collected by scraping the cells into 1 ml of 0.1X binding buffer (in mM: 14 NaCl, 0.15 KCl, 0.2 CaCl<sub>2</sub>, 0.1 MgSO<sub>4</sub>·7H<sub>2</sub>O, 2.5 HEPES hemi-Na) and aspirating from the culture surface with a pipette. The lysed cell suspension was centrifuged at 10,000g for 10 min, and frozen under a fresh volume of 0.1X binding buffer at -80°C until assay. On assay day, cell

membranes were thawed and resuspended in 0.1X binding buffer. A 10  $\mu$ l aliquot of membrane suspension was incubated with 10  $\mu$ l of [ $^3$ H]-epibatidine in ddH<sub>2</sub>O and 10  $\mu$ l 3X binding buffer to yield a final reaction volume of 30  $\mu$ l. Nonspecific binding was determined in the presence of 200  $\mu$ M (-)-cytisine. For most binding studies, the final concentration of [ $^3$ H]-epibatidine was 2 nM, and was varied linearly from 10 nM-4.9 pM for estimation of binding kinetic parameters. Binding took place either at 23°C for 4 hr, or overnight at 4°C. Binding was terminated by filtering the labeled cell membrane suspension onto a glass fiber filter sandwich (Pall type A/D and A/C) presoaked in 0.5% polyethylimine. The filter was rinsed 3 times with ice-cold binding buffer, individual filters were picked and bound radioactivity was measured by scintillation counting in a Beckmann LS6000LL at 45% efficiency. Total protein content was determined by the method of Lowry (1954).

#### **Cell surface biotinylation and biotinylated nAChR capture:**

Briefly, HEK 293 cells were grown to ~80% confluence in 6-well culture plates and transfected as described above. Cells were rinsed twice with 2ml of ice-cold PBS (in mM: 136.89 NaCl, 2.68 KCl, 10.14 Na<sub>2</sub>HPO<sub>4</sub>, 1.76 KH<sub>2</sub>PO<sub>4</sub>; pH 7.4), and 1ml of PBS containing 0.25mg/ml sulfo-NHS-SS-biotin added to each well. Cell surface proteins were biotinylated by incubating with gentle agitation at 4°C for 30 minutes. Biotinylation was quenched by the addition of 10 $\mu$ l/well of 1mM Tris-HCl (pH 7.4; 10mM final concentration) and further incubation for 5 minutes at 23°C. Cells were collected from the wells by gentle suction and centrifuged at 800xG for 2 minutes. The supernatant was removed and the cells gently resuspended in 1ml of TBS (in mM: 50 Tris, 150 NaCl; pH 7.5). The cells were rinsed once more with PBS and then the resulting pellet resuspended in 135 $\mu$ l of PBS and frozed at -80°C until further use. On assay day, cell samples were thawed at 23°C and vigorously resuspended in 0.1x binding buffer. Aliquots of this suspension were taken for measurement of [ $^3$ H]-epibatidine binding sites and determination of total protein content. The remaining cell sample was mixed 1:1 with PBS

supplemented with 4% Triton X-100, 2mM PMSF, and 20 $\mu$ g/ml each of aprotinin, leupeptin, and pepstatin A to effectively solubilize all proteins. Extraction in Triton X-100 took place with gentle agitation at 23°C for one hour, and samples were clarified by centrifugation at 4°C for two minutes at 10,000xG. Aliquots of clarified detergent extracts were taken to measure total protein content.

Measurement of biotinylated nAChRs was achieved by incubating 10 $\mu$ l of detergent extract labeled with 2nM [<sup>3</sup>H]-epibatidine with avidin-coated sepharose beads with gentle agitation for one hour at room temperature. Beads were recovered by filtering the suspension onto glass fiber filters and cpm captured was quantified by liquid scintillation counting.

### **Specific Immunocapture of $\beta$ 2\* nAChRs for Proteomic Analysis:**

M270-mAb295 beads were generated by reacting 0.5  $\mu$ g mAb/mg of beads according to the manufacturer's instructions and stored in PBS+0.5% Triton/0.02% NaN<sub>3</sub> at 4°C until use. HEK 293 cells were grown and transfected as described above. For identification of the nAChR-associated proteome following IP, cells were grown in 10 cm culture plates at an initial density of 50,000 cells/cm<sup>2</sup>, and protein:protein interactions were stabilized by crosslinking with dithiobis(succinimidyl)propionate (DSP; Pierce). 24 hr following transfection, cells were dissociated from the culture surface by incubation with ice-cold PBS and gentle agitation. Cells were aspirated and placed in a 15 ml sterile conical tube and centrifuged at 800g for two minutes. The supernatant was removed and the cells resuspended in 5ml of PBS with 10% (v/v) DMSO and 1 mM DSP (final concentration). The cells were incubated with DSP on ice for 30 min, and crosslinking was terminated by the addition of 10  $\mu$ l of 1M Tris-HCl, and incubation on ice for an additional 15 min. The crosslinked cells were centrifuged at 800g for 2 min, the supernatant was removed and the cells washed gently with 5 ml of ice-cold PBS. The cells were rinsed with PBS an additional two times before being resuspended in 500  $\mu$ l of extraction buffer

(PBS supplemented with 2% Triton X-100, 1 mM phenylmethane sulfonyl fluoride, and 10 µg/ml each of aprotinin, pepstatin and leupeptin). Solubilization of nAChRs was achieved by 27 passages through a sterile 200 µl pipette tip. The solubilized protein was clarified by centrifugation at 20,000g for 20 min. The supernatants were collected and a 40 µl aliquot of extract was taken to quantify [<sup>3</sup>H]-epibatidine binding sites. Two 500 µl extracts were pooled for immunocapture by M270-mAb295 Dynabeads. An aliquot of 400 µl of bead suspension (10 mg/ml) was placed in a clean 1.5 ml Eppendorf tube and the beads were separated by placing the tube in a magnetic rack. The storage buffer was aspirated and the beads rinsed with 1 ml PBS by gentle pipetting. The clarified cell extract was then transferred to the tube containing the rinsed beads and placed in a rotating tube rack at 4°C overnight. The following morning, beads were separated by placing the tube in a magnetic rack, and the supernatant was collected. A 40 µl aliquot of supernatant was collected following incubation with M270-mAb295 Dynabeads to quantify the amount of remaining [<sup>3</sup>H]-epibatidine binding and to quantify captured nAChRs. The beads were rinsed twice with 1.0ml PBS+0.1% Tween-20 and once with 1.0ml PBS. Proteins were eluted from the beads by the addition of 500 µl of elution buffer (500 mM NH<sub>4</sub>OH, 500 µM EDTA, pH 11) and incubated at 23°C with gentle rotation for 20 min. This step was repeated once to ensure complete removal of the receptor complex from the beads. The eluant was lyophilized under vacuum overnight in a DNA120 Speedvac and this dried protein was used for peptide/protein identification by LC-MS/MS.

#### **Enzymatic digestion, LC-MS/MS, and Phosphopeptide analysis:**

The dried protein pellet was dissolved in 12 µl 8M urea, 0.4M ammonium bicarbonate (pH 8.0) prior to reduction using 1.2µl 45mM dithiothreitol (DTT- Thermo Scientific Pierce) and incubating at 37°C for 20 minutes. Alkylation was performed with 1.2µl of 100 mM iodoacetamide (IAN- Sigma-Aldrich) and incubating at ambient temperature for 20 minutes. The urea concentration

was decreased to 2M with water and the samples were digested with 3µg lysyl endopeptidase (Wako Chemicals) for 4 hours at 37°C, and then with 3µg of Promega sequencing grade trypsin for 16 hours at 37°C . After digestion, the digests were desalted using UltraMicroSpin™ C18 columns (#SUM SS18V The Nest Group Inc.) and dried under vacuum. The peptide pellets were dissolved in 50µl 0.5% TFA, 50% acetonitrile for phosphopeptide enrichment using titanium dioxide TopTips (Glygen). Each TopTip was washed 3 times (at 2,000 rpm for 1 minute each spin) with 40µl 100% acetonitrile, followed with a 0.2M sodium phosphate pH 7.0, and 0.5% TFA, 50% acetonitrile washes. The digests were then loaded and spun at 1,000 rpm for 1 minute, and then 3,000 rpm for 2 minutes. The phosphopeptides were eluted using 3 washes of 30µl 28% ammonium hydroxide. Both the enriched (Phospho) and non-bound or flow through (FT) peptide fractions were desalted using a C18 ZipTip® (Millipore). The Phospho fraction was dissolved in 3µl 70% formic acid, plus 9µl 50mM sodium phosphate; the FT fraction was dissolved in 5µl 70% formic acid, plus 20µl 50mM sodium phosphate, and 5µl of each was analyzed by LC-MS/MS. This analysis was performed on a Thermo Scientific LTQ Orbitrap Elite equipped with a Waters nanoACQUITY UPLC® system. Trapping was done at 5µl/min, 99% Buffer A (100% water, 0.1% formic acid), 1% Buffer B (100% acetonitrile, 0.1% formic acid) for 3 minutes on a Waters Symmetry® C18 180µm x 20mm trap column. Peptide separation was performed on a 1.7 µm, 75 µm x 250 mm nanoACQUITY UPLC® column (35°C) at 300 nl/min using a 91 minute linear gradient with 5% buffer B at initial conditions, 40% B at 90 minutes, and 85% B at 91 minutes. MS/MS was performed using higher-energy collisional dissociation (*HCD*) in order to get higher-quality MS/MS spectra. All MS/MS spectra were searched against the NCBI human database using the Mascot algorithm (Matrix Science) and the Mascot Distiller program to generate Mascot compatible files. Search parameters included a peptide mass tolerance of 15 ppm with a fragment mass tolerance of 0.2Da and variable modifications of carbamidocysteine, methionine oxidation, and serine, threonine and tyrosine phosphorylation. Peptides used for protein identification had a confidence interval greater than

95%. For inclusion in subsequent analysis, a protein had to be present in at least one biological replicate and be identified by more than one unique peptide.

### **Electrophysiological Recording of Macroscopic Currents from $\alpha 4\beta 2$ nAChRs Expressed in *Xenopus* Oocytes:**

cRNA was prepared from cDNA clones of human  $\alpha 4$  and  $\beta 2$  nAChR subunits in psp64 poly-A vectors. Subunit cRNAs (20 ng each) were injected into stage 5 oocytes and recordings were obtained within 7 days. Voltage-clamp recordings were made using OpusExpress 600A, with 300  $\mu$ M acetylcholine (ACh) used as a control concentration. Raw data was processed with pClamp10 (Molecular Devices).

Figure S1

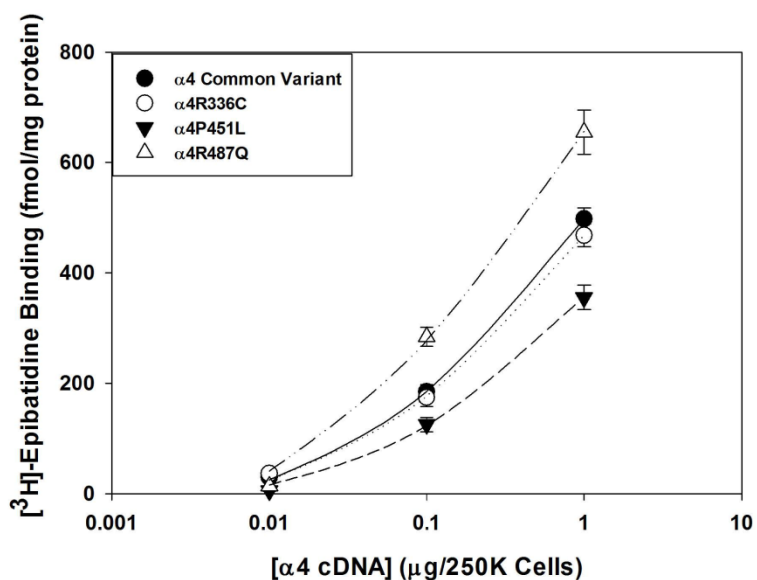

**Figure S 1.** Assembly of nicotinic binding sites is dependent on the concentration of  $\alpha 4$  and  $\beta 2$  nAChR subunit-encoding cDNAs. [ $^3\text{H}$ ]-Epibatidine binding increases with the concentration of  $\alpha 4$  cDNA transfected along with 1  $\mu\text{g}$  of the  $\beta 2$  cDNA. The amount of binding sites produced is saturable, with  $\frac{1}{2}$  maximal  $\alpha 4$  cDNA concentration identical across  $\alpha 4$  variants examined. Estimated maximal binding site production with respect to the common variant of  $\alpha 4$  (black circles), is slightly elevated for  $\alpha 4\text{R487Q}$  (white triangles), decreased for  $\alpha 4\text{P451L}$  (black triangles) and identical for  $\alpha 4\text{R336C}$  (white circles).



Figure S2

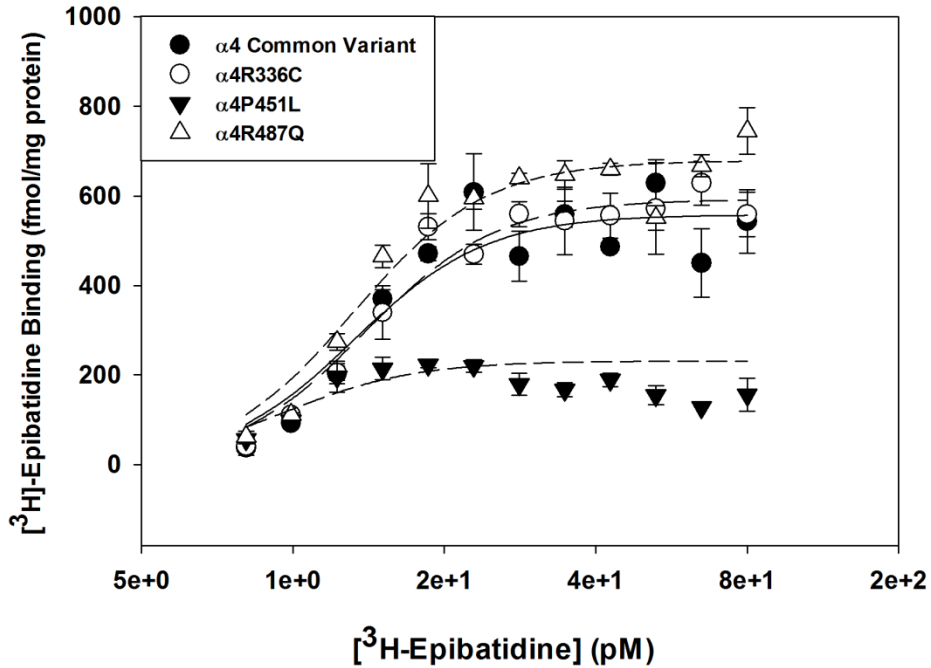

**Figure S2.**  $\alpha 4$  rare variants do not affect nicotinic binding affinity of nAChRs. Saturation of [ $^3\text{H}$ ]-epibatidine binding illustrates that the calculated  $K_d$  for [ $^3\text{H}$ ]-epibatidine is not affected by any of the  $\alpha 4$  polymorphisms examined. The  $B_{\text{max}}$  (relative to common variant; black circles), is significantly lower for  $\alpha 4\text{P451L}$  (black triangles), and slightly higher for  $\alpha 4\text{R487Q}$  (white triangles). The  $B_{\text{max}}$  of  $\alpha 4\text{R336C}$  variant (white circles) is identical to the common variant.

Figure S3

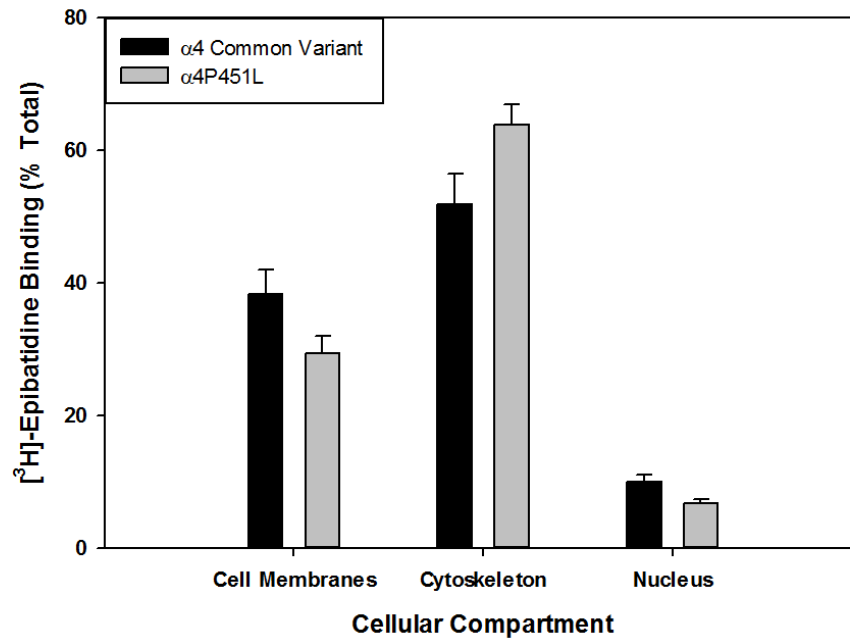

**Figure S3.** The  $\alpha 4P451L$  variant does appreciably affect the subcellular distribution of [ $^3\text{H}$ ]-epibatidine binding sites expressed as percent of total compared to the common  $\alpha 4$  variant.

Figure S4

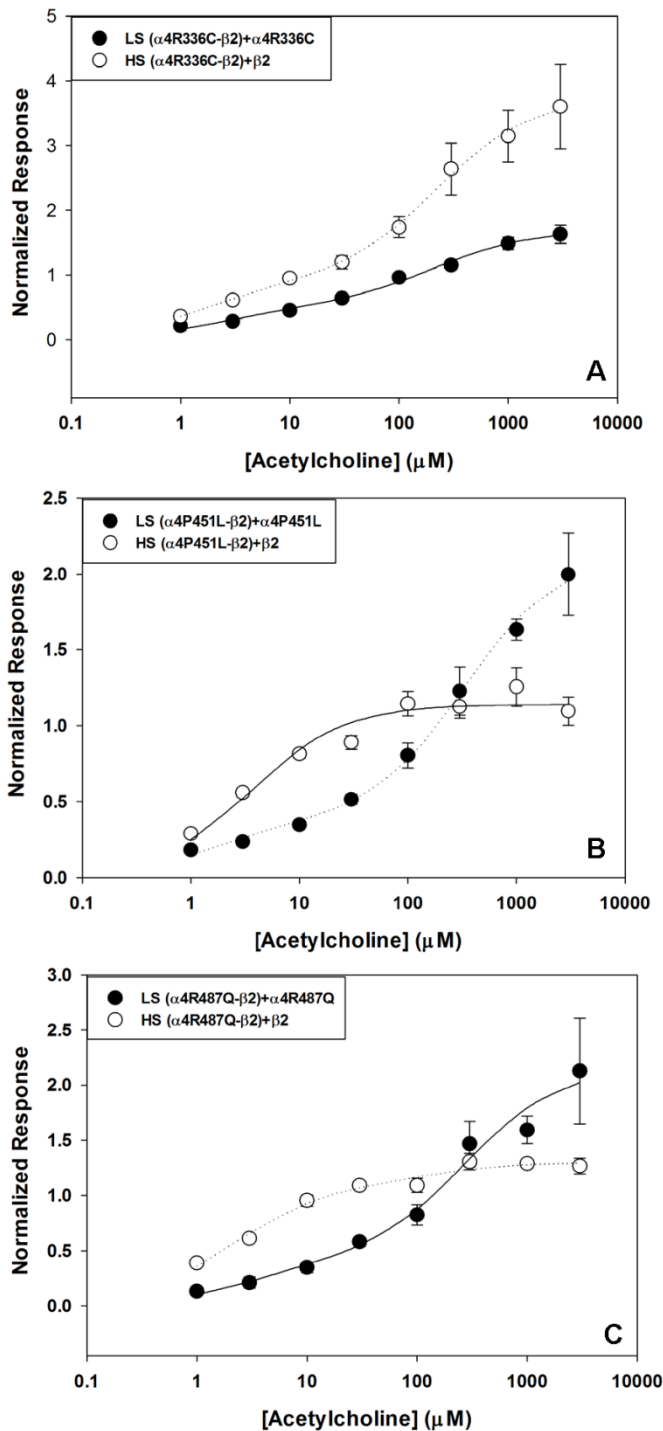

**Figure S4.** Electrophysiological recordings of concatenated  $\alpha 4$  variants expressed in *Xenopus* oocytes activated by acetylcholine. A. The concentration-response curve for  $\alpha 4R336C\text{-}\beta 2$  +  $\alpha 4R336C$  to produce LS receptors (black circles) and  $\alpha 4R336C\text{-}\beta 2$  +  $\beta 2$  to produce HS receptors (white circles) both show the presence of two distinct activation components. B. The concentration-response curve for  $\alpha 4P451L\text{-}\beta 2$  +  $\alpha 4P451L$  to produce LS receptors (black circles) shows the presence of two distinct activation components, while the concentration-response curve for  $\alpha 4P451L\text{-}\beta 2$  +  $\beta 2$  is dominated by a single HS component (white circles). C. Acetylcholine evoked responses from  $\alpha 4R487Q\text{-}\beta 2$  +  $\alpha 4R487Q$  are monophasic and indicative of a single LS activation component (black circles), while  $\alpha 4R487Q\text{-}\beta 2$  +  $\beta 2$  evidences a single HS activation component (white circles).

Figure S5

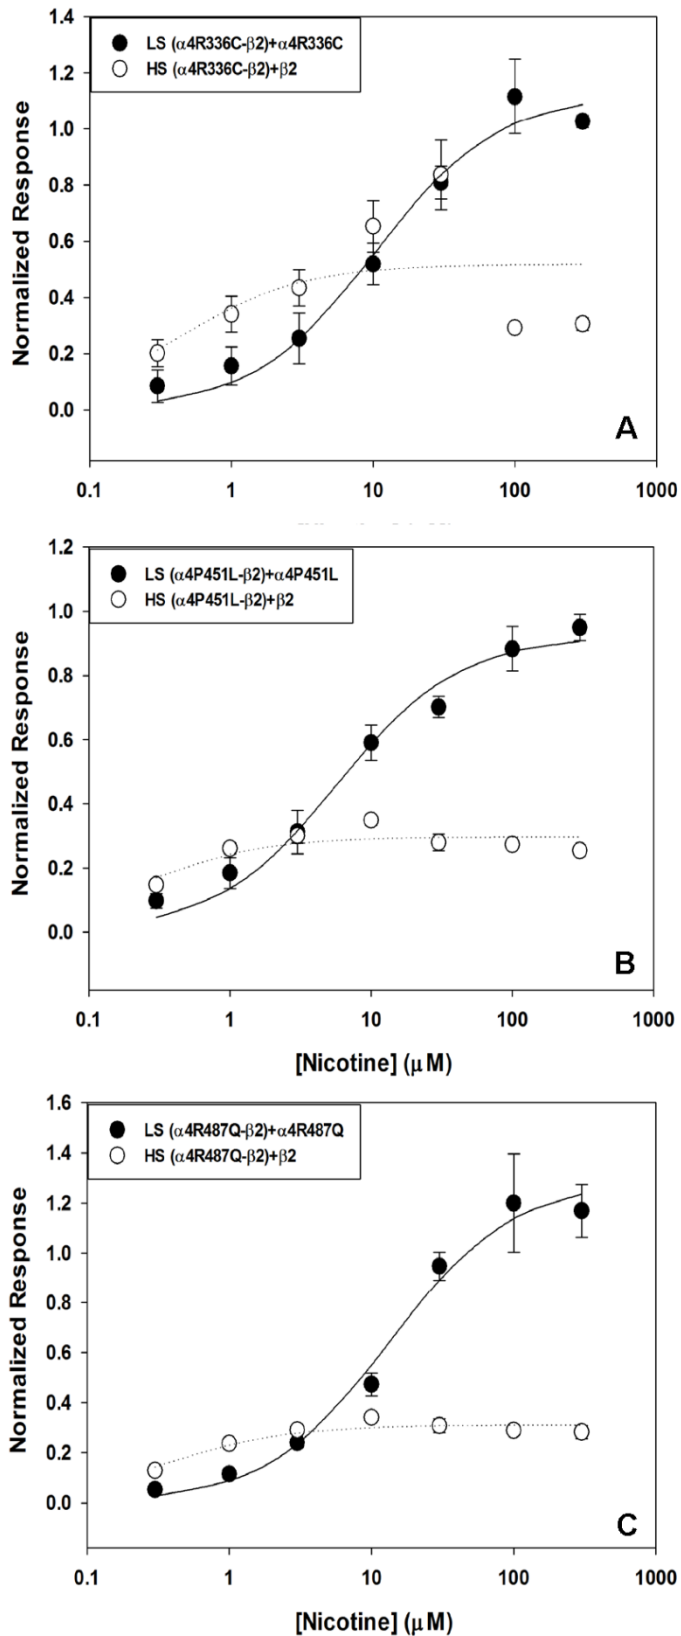

**Figure S5.** Electrophysiological recordings of concatenated  $\alpha 4$  variants expressed in *Xenopus* oocytes activated by nicotine. A. Expression of  $\alpha 4R336C$ - $\beta 2$  +  $\alpha 4R336C$  produces a monophasic concentration-response curve indicative of a single LS component (black circles), while expression of  $\alpha 4R336C$ - $\beta 2$  +  $\beta 2$  produces a monophasic HS curve (white circles). B. The concentration-response profile of  $\alpha 4P451L$ - $\beta 2$  +  $\alpha 4P451L$  activated by nicotine is monophasic and LS (black circles) while  $\alpha 4P451L$ - $\beta 2$  +  $\beta 2$  is monophasic and HS (white circles). C. Activation of  $\alpha 4R487Q$ - $\beta 2$  +  $\alpha 4R487Q$  by nicotine yields a monophasic LS concentration-response profile (black circles), and nicotine activation of  $\alpha 4R487Q$ - $\beta 2$  +  $\beta 2$  is monophasic and HS in nature (white circles).

## Functional Characterization of $\alpha 4\beta 2$ Rare Variants as Concatamers

Since the functional parameters of  $\alpha 4\beta 2$  nAChRs are strongly dependent on the pentameric arrangement in which they assemble, we tested the three rare  $\alpha 4$  variants as components of nAChR concatamers. Concatenated subunit dimers ( $\alpha 4\beta 2$ ) expressed in *Xenopus* oocytes either alone or with additional free  $\alpha$  or  $\beta$  subunits reliably assemble into defined stoichiometries. We expected that constraining nAChR stoichiometry by expressing the rare  $\alpha 4$  variants as part of a concatenated dimer with  $\beta 2$  would allow measures of functional parameters of HS and LS forms in isolation. Surprisingly, curve-fit calculations of the concentration-response relationships for ACh were not uniform, and under certain conditions the presence of two distinct activation components were observed. For  $(\alpha 4R336C\text{-}\beta 2)+\beta 2$ , the ACh concentration-response curve shows the presence of both HS and LS components, even though the mix of concatamer with free  $\beta 2$  typically produces a pure HS population of nAChRs (Table S3A). For  $(\alpha 4R336C\text{-}\beta 2)+\alpha 4R336C$ , again we observed a concentration-response profile with both HS and LS components (Figure S4A). Instead,  $(\alpha 4P451L\text{-}\beta 2)+\beta 2$ , reliably produced a single HS activation profile, whereas  $(\alpha 4P451L\text{-}\beta 2)+\alpha 4P451L$ , resulted in both HS and LS ACh responses (Figure S4B). Finally, either  $(\alpha 4R487Q)+\alpha 4R487Q$  or  $+\beta 2$ , produces a uniform population of LS or HS activation components, respectively (Figure S4C). In contrast, there was only a single activation component in response to nicotine challenge for each  $\alpha 4$  rare variant (Figure S5, Table S3B). Concatenated  $\alpha 4\text{-}\beta 2$  dimers with the addition of free  $\alpha 4$  or  $\beta 2$  subunits normally produce highly constrained expression of LS or HS receptors (as it did in the case of  $\alpha 4R487Q$ ). With activation of  $\alpha 4R336C$  and  $\alpha 4P451L$  concatamers by ACh, there was still a significant biphasic concentration-response profile. This effect was absent when nicotine was applied as the agonist, probably because of greater channel blockade by nicotine at concentrations  $>30\mu\text{M}$ . We

hypothesize that assembly of  $\alpha$ 4P451L is so inefficient that a significant portion of the concatamers form dipentamers rather than incorporate free  $\alpha$ 4P451L subunit. When free  $\beta$ 2 is added to the  $\alpha$ 4P451L- $\beta$ 2 concatamer, by contrast, HS receptors are assembled as expected.

Table S1

| Protein ID | Protein Name                                                             | MW     | Uniprot ID | Subcellular location  | CV Score | R336C Score | P451L Score | R487Q Score |
|------------|--------------------------------------------------------------------------|--------|------------|-----------------------|----------|-------------|-------------|-------------|
| 194386896  | cDNA FLJ54023, highly similar to Heat shock protein HSP 90-beta          | 79145  | B4DMA2     | Cytoplasm             | NP       | NP          | NP          | 89          |
| 194379304  | ATP synthase subunit alpha                                               | 57542  | B4DY56     | Cell Membrane         | NP       | NP          | NP          | 117         |
| 2102696    | Importin-5                                                               | 123512 | O00410     | Cytoplasm             | NP       | NP          | 91          | NP          |
| 5453998    | Importin-7)                                                              | 119440 | O95373     | Cytoplasm             | NP       | NP          | 79          | NP          |
| 4885165    | Cystatin-A                                                               | 11000  | P01040     | Cytoplasm             | NP       | NP          | NP          | 71          |
| 122920512  | Serum albumin                                                            | 66412  | P02768     | Secreted              | NP       | 115         | NP          | NP          |
| 110590597  | Serotransferrin                                                          | 74643  | P02787     | Secreted              | 245      | NP          | NP          | NP          |
| 4506675    | Dolichyl-diphosphooligosaccharide--protein glycosyltransferase subunit 1 | 68527  | P04843     | Endoplasmic reticulum | NP       | NP          | NP          | 77          |
| 21361181   | Sodium/potassium-transporting ATPase subunit alpha-1                     | 112824 | P05023     | Cell membrane         | 93       | 104         | NP          | 114         |
| 4506773    | Protein S100-A9                                                          | 13234  | P06702     | Secreted              | NP       | NP          | 76          | 90          |
| 32488      | Heat shock protein HSP 90-alpha                                          | 84621  | P07900     | Cytoplasm             | NP       | NP          | NP          | 135         |
| 386785     | Heat shock 70 kDa protein 1A/1B                                          | 69825  | P08107     | Cytoplasm             | NP       | 128         | 91          | 191         |
| 306891     | Heat shock protein HSP 90-beta                                           | 83242  | P08238     | Cytoplasm             | NP       | 87          | NP          | NP          |
| 30866      | Signal recognition particle receptor subunit alpha                       | 69880  | P08240     | Endoplasmic Reticulum | NP       | 71          | NP          | NP          |
| 5030431    | Vimentin                                                                 | 41537  | P08670     | Cytoplasm             | NP       | 106         | 69          | 83          |
| 109157809  | Polyubiquitin-C                                                          | 9016   | P0CG48     | Cytoplasm             | NP       | 69          | NP          | 87          |
| 6470150    | 78 kDa glucose-regulated protein                                         | 70888  | P11021     | Endoplasmic reticulum | 243      | 343         | 196         | 391         |
| 5729877    | Heat shock cognate 71 kDa protein                                        | 70854  | P11142     | Cytoplasm             | 102      | 133         | 194         | 235         |

|          |                                                 |        |        |                       |      |      |     |      |
|----------|-------------------------------------------------|--------|--------|-----------------------|------|------|-----|------|
| 307066   | Inosine-5'-monophosphate dehydrogenase 2        | 55885  | P12268 | Cytoplasm             | NP   | 69   | 93  | 75   |
| 4503483  | Elongation factor 2                             | 95277  | P13639 | Cytoplasm             | NP   | 84   | 67  | NP   |
| 4758304  | Protein disulfide-isomerase A4                  | 72887  | P13667 | Endoplasmic reticulum | 83   | 75   | NP  | 108  |
| 35505    | Pyruvate kinase isozymes M1/M2                  | 57841  | P14618 | Cytoplasm             | NP   | 83   | NP  | 89   |
| 4507677  | Endoplasmin                                     | 92411  | P14625 | Endoplasmic reticulum | NP   | NP   | NP  | 95   |
| 15055539 | 40S ribosomal protein S2                        | 31305  | P15880 | Cytoplasm             | NP   | NP   | NP  | 85   |
| 3766451  | Neuronal acetylcholine receptor subunit beta-2  | 57149  | P17787 | Cell Membrane         | 265  | 426  | 165 | 392  |
| 338490   | E3 ubiquitin-protein ligase TRIM21              | 54109  | P19474 | Cytoplasm             | 92   | 122  | 85  | 245  |
| 32532    | 40S ribosomal protein S3                        | 26703  | P23396 | Cytoplasm             | 72   | 79   | NP  | 76   |
| 5803227  | 14-3-3 protein theta                            | 27747  | P27348 | Cytoplasm             | 135  | 206  | NP  | 151  |
| 4757900  | Calreticulin                                    | 48112  | P27797 | Endoplasmic reticulum | 78   | 109  | NP  | 174  |
| 10716563 | Calnexin                                        | 67526  | P27824 | Endoplasmic reticulum | 171  | 338  | 155 | 338  |
| 860986   | Protein disulfide-isomerase A3                  | 56644  | P30101 | Endoplasmic reticulum | NP   | 83   | NP  | 73   |
| 30268331 | Myosin-9                                        | 154064 | P35579 | Cytoplasm             | 116  | NP   | 234 | 159  |
| 641958   | Myosin-10                                       | 228798 | P35580 | Cytoplasm             | 107  | 71   | 194 | NP   |
| 4758032  | Coatamer subunit beta                           | 102422 | P35606 | Cytoplasm             | NP   | 84   | NP  | 98   |
| 337580   | 60S ribosomal protein L3                        | 45440  | P39023 | Cytoplasm             | 69   | NP   | NP  | NP   |
| 4432748  | 40S ribosomal protein S27                       | 7686   | P42677 | Cytoplasm             | NP   | NP   | NP  | 82   |
| 854159   | Neuronal acetylcholine receptor subunit alpha-4 | 67363  | P43681 | Cell Membrane         | 1060 | 1400 | 318 | 1289 |



|           |                                                |        |        |                       |     |     |     |     |
|-----------|------------------------------------------------|--------|--------|-----------------------|-----|-----|-----|-----|
| 4826960   | Glutamine--tRNA ligase                         | 87743  | P47897 | Cytoplasm             | NP  | 71  | NP  | NP  |
| 550343    | B-cell receptor-associated protein 31          | 27989  | P51572 | Endoplasmic reticulum | NP  | 112 | NP  | 103 |
| 1002369   | Coatomer subunit alpha                         | 138244 | P53621 | Cytoplasm             | NP  | 127 | NP  | 90  |
| 6005942   | Transitional endoplasmic reticulum ATPase      | 89266  | P55072 | Cytoplasm             | NP  | 71  | NP  | 80  |
| 188590    | Myosin light polypeptide 6                     | 16920  | P60660 | Cytoplasm             | 72  | NP  | 87  | 89  |
| 28336     | Actin, cytoplasmic 1                           | 41786  | P60709 | Cytoplasm             | 200 | 213 | 410 | 299 |
| 5803225   | 14-3-3 protein epsilon                         | 29155  | P62258 | Cytoplasm             | 73  | 165 | NP  | 135 |
| 4506701   | 40S ribosomal protein S23                      | 15798  | P62266 | Cytoplasm             | NP  | 69  | 90  | 74  |
| 6755368   | 40S ribosomal protein S18                      | 17708  | P62270 | Cytoplasm             | NP  | NP  | 83  | NP  |
| 4506681   | 40S ribosomal protein S11                      | 18419  | P62280 | Cytoplasm             | NP  | NP  | NP  | 88  |
| 337930    | 40S ribosomal protein S4, X isoform            | 27386  | P62701 | Cytoplasm             | 92  | 166 | 76  | 161 |
| 4507953   | 14-3-3 protein zeta/delta                      | 27728  | P63104 | Cytoplasm             | 100 | 113 | NP  | 87  |
| 181486    | Nuclease-sensitive element-binding protein 1   | 39954  | P67809 | Cytoplasm             | 91  | NP  | 69  | NP  |
| 31092     | Elongation factor 1-alpha 1                    | 50095  | P68104 | Cytoplasm             | NP  | 74  | NP  | NP  |
| 32015     | Tubulin alpha-4A chain                         | 49761  | P68366 | Cytoplasm             | NP  | 84  | NP  | NP  |
| 4758012   | Clathrin heavy chain 1                         | 191493 | Q00610 | Cytoplasm             | NP  | NP  | 94  | NP  |
| 36138     | 60S ribosomal protein L6                       | 32841  | Q02878 | Cytoplasm             | NP  | 108 | NP  | 81  |
| 190406    | Profilaggrin                                   | 133528 | Q05331 | Cytoplasm             | NP  | 72  | NP  | NP  |
| 119618177 | Cytoskeleton-associated protein 4              | 37383  | Q07065 | Endoplasmic reticulum | NP  | 106 | NP  | 117 |
| 1060888   | 26S proteasome non-ATPase regulatory subunit 2 | 100122 | Q13200 | Proteasome            | NP  | NP  | NP  | 96  |
| 7661048   | Melanin                                        | 22214  | Q14165 | Endoplasmic           | NP  | NP  | NP  | 96  |

|          |                                                                              |        |        |                       |    |     |     |     |
|----------|------------------------------------------------------------------------------|--------|--------|-----------------------|----|-----|-----|-----|
| 7001940  | reticulum                                                                    | 52214  | Q14103 | reticulum             | NP | NP  | NP  | 90  |
| 7705855  | Estradiol 17-beta-dehydrogenase 12                                           | 34302  | Q53GQ0 | Endoplasmic reticulum | NP | 113 | NP  | 85  |
| 62896517 | Ribosomal protein S4, X-linked X isoform variant                             | 29560  | Q53HV1 | Cytoplasm             | NP | NP  | 136 | NP  |
| 46329880 | SPTLC1 protein                                                               | 57360  | Q6NUL7 | Endoplasmic Reticulum | NP | 83  | NP  | NP  |
| 296164   | Kinectin                                                                     | 155997 | Q86UP2 | Endoplasmic Reticulum | NP | 71  | NP  | NP  |
| 19263767 | Similar to cytoskeleton-associated protein 4                                 | 62023  | Q8TB01 | Cytoplasm             | 86 | NP  | NP  | NP  |
| 9622124  | Retinol dehydrogenase 11                                                     | 35391  | Q8TC12 | Endoplasmic Reticulum | NP | 77  | NP  | 75  |
| 30578410 | Dolichyl-diphosphooligosaccharide--protein glycosyltransferase subunit STT3B | 93614  | Q8TCJ2 | Endoplasmic reticulum | NP | NP  | NP  | 77  |
| 18204869 | TUBA1B protein                                                               | 37194  | Q8WU19 | Cytoplasm             | NP | NP  | NP  | 90  |
| 4506651  | 60S ribosomal protein L36a-like                                              | 12461  | Q969Q0 | Cytoplasm             | NP | NP  | 69  | NP  |
| 4240263  | FAS-associated factor 2                                                      | 52388  | Q96CS3 | Cytoplasm             | NP | 76  | NP  | 121 |
| 4884343  | Extended synaptotagmin-1                                                     | 81391  | Q9BSJ8 | Cell Membrane         | 79 | 124 | NP  | 131 |
| 9453734  | Ras-related GTP-binding protein D                                            | 28593  | Q9NQL2 | Cytoplasm             | NP | 96  | NP  | NP  |
| 3329386  | Very-long-chain enoyl-CoA reductase                                          | 36038  | Q9NZ01 | Endoplasmic reticulum | 91 | 154 | 84  | 135 |
| 6851089  | Protein sel-1 homolog 1                                                      | 88667  | Q9UBV2 | Endoplasmic Reticulum | NP | 94  | NP  | 71  |

Table S2

| Protein ID | Protein Name                                                                                   | MW     | Uniprot ID | Subcellular location  | CV Score | R336C Score | P451L Score | R487Q Score |
|------------|------------------------------------------------------------------------------------------------|--------|------------|-----------------------|----------|-------------|-------------|-------------|
| 4502209    | ADP-ribosylation factor 5                                                                      | 20517  | A4D0Z3     | Cytoplasm             | 72       | NP          | NP          | NP          |
| 7022616    | SHINC3                                                                                         | 27933  | A6QKW0     | Cell membrane         | 82       | 131         | NP          | 96          |
| 158261809  | cDNA FLJ78433, highly similar to Homo sapiens chaperonin containing TCP1, subunit 5            | 59692  | A8K2X8     | Cytoplasm             | NP       | 114         | NP          | NP          |
| 189054116  | cDNA, FLJ94551                                                                                 | 26178  | B2R9T9     | Unknown               | NP       | 79          | NP          | NP          |
| 193785552  | cDNA FLJ10609 fis, clone NT2RP2005276, highly similar to Long-chain-fatty-acid--CoA ligase 3 ) | 51273  | B3KMA6     | Cytoplasm             | NP       | 93          | NP          | NP          |
| 193785682  | cDNA FLJ12728 fis, clone NT2RP2000040, highly similar to Protein FAM62A                        | 122829 | B3KMV5     | Cell membrane         | 92       | NP          | NP          | 258         |
| 193783680  | cDNA FLJ40884 fis, clone UTERU2000607, highly similar to Alpha-actinin-1                       | 54247  | B3KUX9     | Cytoplasm             | NP       | 78          | NP          | 127         |
| 193785970  | cDNA FLJ16143 fis, clone BRAMY2038516, highly similar to Protein disulfide-isomerase A6        | 53256  | B3KY95     | Endoplasmic reticulum | 155      | 214         | NP          | NP          |
| 194378936  | cDNA FLJ56344, highly similar to Implantation-associated protein                               | 41432  | B4DH58     | Cell membrane         | NP       | 89          | NP          | NP          |
| 194386896  | cDNA FLJ54023, highly similar to Heat shock protein HSP 90-beta                                | 79145  | B4DMA2     | Cytoplasm             | NP       | 515         | 506         | 548         |
| 194379448  | unnamed protein product                                                                        | 53862  | B4DYC8     | Cytoplasm             | NP       | 108         | 112         | NP          |
| 194385368  | unnamed protein product                                                                        | 99616  | B4E299     | Cytoplasm             | NP       | NP          | 119         | NP          |
| 212293358  | Actinin alpha 1 isoform 3                                                                      | 107074 | B7TY16     | Cytoplasm             | NP       | NP          | NP          | 98          |
| 221040644  | cDNA FLJ54432, highly similar to Alpha-actinin-1                                               | 67100  | B7Z2W3     | Cytoplasm             | NP       | 104         | NP          | NP          |
| 221041874  | cDNA FLJ58023, highly similar to Protein disulfide-isomerase A6                                | 48670  | B7Z4M8     | Endoplasmic reticulum | 184      | NP          | NP          | NP          |
| 221042282  | cDNA FLJ53638, highly similar to Annexin A6                                                    | 61814  | B7Z582     | Secreted              | NP       | 143         | NP          | NP          |

|           |                                                                      |        |        |                       |     |     |     |     |
|-----------|----------------------------------------------------------------------|--------|--------|-----------------------|-----|-----|-----|-----|
| 221043506 | unnamed protein product                                              | 26690  | B7Z6Z4 | Cytoplasm             | NP  | NP  | 238 | NP  |
| 221045918 | cDNA, FLJ79164, highly similar to Tubulin beta-7 chain               | 46537  | B7ZAF0 | Cytoplasm             | NP  | 471 | NP  | NP  |
| 31179     | enolase                                                              | 49446  | E2DRY6 | Cell membrane         | NP  | NP  | 82  | NP  |
| 119590078 | Transducin beta-like protein 2                                       | 46318  | E9PF19 | Unknown               | NP  | NP  | NP  | 146 |
| 5729875   | Membrane-associated progesterone receptor component 1                | 21658  | O00264 | Endoplasmic reticulum | NP  | 276 | NP  | 222 |
| 24797086  | importin-5                                                           | 125464 | O00410 | Cytoplasm             | NP  | NP  | 316 | NP  |
| 6755448   | Vesicle-trafficking protein SEC22b                                   | 24725  | O08547 | Endoplasmic reticulum | 178 | 217 | 176 | 172 |
| 4504733   | Insulin receptor substrate 4                                         | 133685 | O14654 | Cell membrane         | NP  | 111 | 86  | 71  |
| 15809016  | myosin regulatory light chain 12B                                    | 19767  | O14950 | Cytoplasm             | NP  | NP  | 131 | NP  |
| 5454084   | Serine palmitoyltransferase 1                                        | 52710  | O15269 | Endoplasmic reticulum | 105 | 112 | 86  | 107 |
| 2337920   | Syntaxin-7                                                           | 29827  | O15400 | Cell membrane         | NP  | 103 | NP  | NP  |
| 4506133   | phosphoribosyl pyrophosphate synthase-associated protein 2 isoform 1 | 40899  | O60256 | Cytoplasm             | NP  | 136 | 95  | NP  |
| 4507285   | Syntaxin-10                                                          | 28096  | O60499 | Golgi apparatus       | 74  | NP  | NP  | NP  |
| 3037013   | Heterogeneous nuclear ribonucleoprotein Q                            | 69590  | O60506 | Cytoplasm             | NP  | NP  | NP  | 87  |
| 4885637   | Target of Myb protein 1                                              | 53785  | O60784 | Cytoplasm             | NP  | NP  | NP  | NP  |
| 62896519  | Erlin-1                                                              | 38929  | O75477 | Endoplasmic reticulum | NP  | 135 | NP  | 127 |
| 6005721   | Erlin-2                                                              | 37815  | O94905 | Endoplasmic reticulum | 320 | 362 | 196 | 376 |

|           |                                                                          |        |        |                       |     |     |     |     |
|-----------|--------------------------------------------------------------------------|--------|--------|-----------------------|-----|-----|-----|-----|
| 4759302   | Vesicle-associated membrane protein-associated protein B/C               | 27211  | O95292 | Endoplasmic reticulum | 87  | 131 | NP  | 72  |
| 5453998   | importin-7                                                               | 119440 | O95373 | Cytoplasm             | NP  | NP  | 556 | NP  |
| 5031857   | L-lactate dehydrogenase A chain isoform 1                                | 36665  | P00338 | Cytoplasm             | 124 | NP  | 136 | NP  |
| 284448551 | NADH-cytochrome b5 reductase 3                                           | 38202  | P00387 | Endoplasmic reticulum | NP  | 94  | NP  | NP  |
| 4885165   | Cystatin-A                                                               | 11000  | P01040 | Cytoplasm             | 72  | NP  | NP  | NP  |
| 122920512 | Serum albumin                                                            | 66412  | P02768 | Secreted              | 75  | 114 | NP  | NP  |
| 31645     | Glyceraldehyde-3-phosphate dehydrogenase                                 | 36031  | P04406 | Cytoplasm             | 146 | 242 | NP  | 164 |
| 4506675   | Dolichyl-diphosphooligosaccharide--protein glycosyltransferase subunit 1 | 68527  | P04843 | Endoplasmic reticulum | 467 | 503 | 348 | 455 |
| 209413738 | Dolichyl-diphosphooligosaccharide--protein glycosyltransferase subunit 2 | 67681  | P04844 | Endoplasmic reticulum | 338 | 518 | 357 | 498 |
| 34740335  | Tubulin alpha-1B chain                                                   | 50120  | P05213 | Cytoplasm             | 378 | 599 | 564 | 413 |
| 4506671   | 60S acidic ribosomal protein P2                                          | 11658  | P05387 | Cytoplasm             | 91  | NP  | 144 | NP  |
| 693933    | Alpha-enolase                                                            | 47079  | P06733 | Cytoplasm             | 94  | 190 | 77  | 113 |
| 114155146 | Tropomyosin alpha-3 chain                                                | 28938  | P06753 | Cytoplasm             | 150 | 76  | 240 | 109 |
| 4557032   | L-lactate dehydrogenase B chain                                          | 36615  | P07195 | Cytoplasm             | 119 | 159 | 82  | 149 |
| 34364597  | Annexin A2                                                               | 40328  | P07355 | Secreted              | 102 | 141 | 87  | 103 |
| 338695    | beta-tubulin                                                             | 49727  | P07437 | Cytoplasm             | 302 | 664 | 361 | NP  |
| 31958     | Bifunctional glutamate/proline--tRNA ligase                              | 162923 | P07814 | Cytoplasm             | NP  | 70  | NP  | NP  |
| 61656603  | Heat shock protein HSP 90-alpha                                          | 98052  | P07900 | Cytoplasm             | 318 | 450 | 476 | 548 |
| 4529892   | Heat shock 70 kDa protein 1A/1B                                          | 69982  | P08107 | Cytoplasm             | 411 | 712 | 634 | 668 |
|           |                                                                          |        |        | Cell                  |     |     |     |     |

|           |                                                     |        |        |                        |      |      |      |      |
|-----------|-----------------------------------------------------|--------|--------|------------------------|------|------|------|------|
| 178685    | 4F2 cell-surface antigen heavy chain                | 57926  | P08195 | Cell membrane          | NP   | 91   | NP   | NP   |
| 306891    | Heat shock protein HSP 90-beta                      | 83242  | P08238 | Cytoplasm              | 375  | NP   | NP   | NP   |
| 23308697  | Signal recognition particle receptor subunit alpha  | 69767  | P08240 | Endoplasmic reticulum  | NP   | 94   | NP   | NP   |
| 62414289  | Vimentin                                            | 53619  | P08670 | Cytoplasm              | 419  | 134  | 691  | 441  |
| 119624911 | Polyubiquitin-B                                     | 16792  | P0CG47 | Cytoplasm              | NP   | 373  | 254  | NP   |
| 31615803  | Polyubiquitin-C                                     | 8555   | P0CG48 | Cytoplasm              | 162  | NP   | NP   | 356  |
| 6470150   | 78 kDa glucose-regulated protein                    | 70888  | P11021 | Endoplasmic reticulum  | 1157 | 1095 | 1012 | 1079 |
| 5729877   | Heat shock cognate 71 kDa protein                   | 70854  | P11142 | Cytoplasm              | 543  | 897  | 640  | 813  |
| 693937    | polyadenylate binding protein II                    | 58481  | P11940 | Cytoplasm              | NP   | NP   | 217  | NP   |
| 66933016  | inosine-5'-monophosphate dehydrogenase 2            | 55770  | P12268 | Cytoplasm              | NP   | NP   | 205  | 104  |
| 28334     | Alpha-actinin-1                                     | 102910 | P12814 | Cytoplasm              | NP   | NP   | 169  | 92   |
| 4503483   | Elongation factor 2                                 | 95277  | P13639 | Cytoplasm              | 148  | 259  | 202  | 242  |
| 4758304   | Protein disulfide-isomerase A4                      | 72887  | P13667 | Endoplasmic reticulum  | 86   | 127  | NP   | NP   |
| 182855    | Glucosidase 2 subunit beta                          | 59259  | P14314 | Endoplasmic reticulum. | 121  | 112  | NP   | 88   |
| 35505     | Pyruvate kinase isozymes M1/M2                      | 57841  | P14618 | Cytoplasm              | NP   | 88   | NP   | NP   |
| 4507677   | Endoplasmin                                         | 92411  | P14625 | Endoplasmic reticulum  | 238  | 244  | 164  | 273  |
| 15055539  | 40S ribosomal protein S2                            | 31305  | P15880 | Cytoplasm              | NP   | NP   | 229  | NP   |
| 4502285   | Sarcoplasmic/endoplasmic reticulum calcium ATPase 2 | 109620 | P16615 | Endoplasmic reticulum  | 212  | 379  | 230  | 347  |

|           |                                                  |       |        |                       |      |      |     |      |
|-----------|--------------------------------------------------|-------|--------|-----------------------|------|------|-----|------|
| 4502833   | Neuronal acetylcholine receptor subunit beta-2   | 56982 | P17787 | Cell membrane         | 1371 | 1855 | 802 | 1625 |
| 1827881   | Tyrosine-protein phosphatase non-receptor type 1 | 37273 | P18031 | Endoplasmic reticulum | NP   | 114  | NP  | 73   |
| 35903     | ribosomal protein L7                             | 29164 | P18124 | Cytoplasm             | NP   | NP   | 87  | NP   |
| 14994115  | E3 ubiquitin-protein ligase TRIM21               | 54234 | P19474 | Cytoplasm             | 202  | 232  | 257 | 378  |
| 254540166 | 78 kDa glucose-regulated protein precursor       | 72377 | P20029 | Endoplasmic reticulum | NP   | NP   | 850 | NP   |
| 181250    | Peptidyl-prolyl cis-trans isomerase B            | 22597 | P23284 | Endoplasmic reticulum | 87   | 122  | NP  | NP   |
| 7765076   | 40S ribosomal protein S3                         | 26699 | P23396 | Cytoplasm             | 181  | 242  | 326 | 277  |
| 119604798 | Elongation factor 1-beta                         | 31167 | P24534 | Cytoplasm             | NP   | 86   | 71  | NP   |
| 29383     | 60S ribosomal protein L13                        | 24277 | P26373 | Cytoplasm             | 74   | NP   | 139 | 97   |
| 4503481   | Elongation factor 1-gamma                        | 50087 | P26641 | Cytoplasm             | 165  | 260  | 236 | 213  |
| 5803227   | 14-3-3 protein theta                             | 27747 | P27348 | Cytoplasm             | 401  | 492  | 132 | 382  |
| 184407    | 60S ribosomal protein L10                        | 24561 | P27635 | Cytoplasm             | NP   | 109  | 135 | 111  |
| 4757900   | Calreticulin                                     | 48112 | P27797 | Endoplasmic reticulum | 123  | 108  | 149 | 92   |
| 10716563  | Calnexin                                         | 67526 | P27824 | Endoplasmic reticulum | 462  | 635  | 442 | 541  |
| 558526    | Proteasome subunit beta type-5                   | 22882 | P28074 | Cytoplasm             | 76   | 96   | NP  | NP   |
| 35553     | ATP-binding cassette sub-family D member 3       | 75539 | P28288 | Peroxisome            | NP   | NP   | NP  | 118  |
| 38522     | Elongation factor 1-delta                        | 31202 | P29692 | Cytoplasm             | NP   | NP   | NP  | 75   |
| 5803013   | Endoplasmic reticulum resident protein 29        | 28975 | P30040 | Endoplasmic reticulum | NP   | 71   | NP  | NP   |

|           |                                                                                                                               |        |        |                       |      |      |     |      |
|-----------|-------------------------------------------------------------------------------------------------------------------------------|--------|--------|-----------------------|------|------|-----|------|
| 4506597   | 60S ribosomal protein L12                                                                                                     | 17808  | P30050 | Cytoplasm             | NP   | NP   | 95  | NP   |
| 220702506 | Protein disulfide-isomerase A3                                                                                                | 54199  | P30101 | Endoplasmic reticulum | 313  | 323  | 256 | 292  |
| 122921194 | Chain A, Crystal Structure Of Protein Phosphatase 2a (Pp2a) Holoenzyme With The Catalytic Subunit Carboxyl Terminus Truncated | 64375  | P30153 | Cytoplasm             | NP   | NP   | 95  | NP   |
| 219588    | DnaJ protein homolog                                                                                                          | 44848  | P31689 | Membrane              | NP   | NP   | 88  | NP   |
| 4507949   | 14-3-3 protein beta/alpha                                                                                                     | 28065  | P31946 | Cytoplasm             | 374  | 369  | NP  | 326  |
| 438069    | Peroxi redoxin-2                                                                                                              | 21843  | P32119 | Cytoplasm             | NP   | 84   | NP  | 91   |
| 12667788  | Myosin-9                                                                                                                      | 226392 | P35579 | Cytoplasm             | 262  | 121  | 875 | 196  |
| 119610456 | myosin, heavy polypeptide 10, non-muscle, isoform CRA_c                                                                       | 228886 | P35580 | Cytoplasm             | NP   | NP   | 318 | NP   |
| 4758032   | Coatomer subunit beta                                                                                                         | 102422 | P35606 | Cytoplasm             | 107  | 117  | 92  | 124  |
| 16579885  | 60S ribosomal protein L4                                                                                                      | 47667  | P36578 | Cytoplasm             | NP   | NP   | 156 | NP   |
| 239938926 | Dolichyl-diphosphooligosaccharide--protein glycosyltransferase 48 kDa subunit                                                 | 50769  | P39656 | Endoplasmic reticulum | NP   | 329  | 279 | 305  |
| 4506711   | 40S ribosomal protein S27                                                                                                     | 9455   | P42677 | Cytoplasm             | NP   | 68   | 70  | NP   |
| 854159    | Neuronal acetylcholine receptor subunit alpha-4                                                                               | 67363  | P43681 | Cell membrane         | 2067 | 2787 | 627 | 2340 |
| 4506625   | 60S ribosomal protein L27a                                                                                                    | 16551  | P46776 | Cytoplasm             | 123  | 99   | 159 | 141  |
| 550019    | 60S ribosomal protein L28                                                                                                     | 15752  | P46779 | Cytoplasm             | NP   | NP   | 107 | 91   |
| 550023    | ribosomal protein S9                                                                                                          | 22558  | P46781 | Cytoplasm             | 69   | NP   | 103 | NP   |
| 550021    | 40S ribosomal protein S5                                                                                                      | 22763  | P46782 | Cytoplasm             | 101  | 176  | 106 | 118  |
| 624704    | Dolichyl-diphosphooligosaccharide--protein glycosyltransferase subunit STT3A                                                  | 80419  | P46977 | Endoplasmic reticulum | NP   | 116  | NP  | 101  |
| 793843    | ribosomal protein L29                                                                                                         | 17656  | P47914 | Cytoplasm             | NP   | NP   | 78  | NP   |



|           |                                                        |        |        |                       |     |     |     |     |
|-----------|--------------------------------------------------------|--------|--------|-----------------------|-----|-----|-----|-----|
| 13491174  | MARCKS-related protein                                 | 19517  | P49006 | Cytoplasm             | NP  | 80  | NP  | NP  |
| 915392    | Fatty acid synthase                                    | 272919 | P49327 | Cytoplasm             | NP  | NP  | NP  | 81  |
| 28375485  | Transmembrane emp24 domain-containing protein 10       | 25619  | P49755 | Golgi apparatus       | 76  | 117 | NP  | 145 |
| 119617519 | hCG2014475                                             | 23244  | P50914 | Cytoplasm             | NP  | NP  | 112 | 84  |
| 1136741   | T-complex protein 1 subunit theta                      | 58465  | P50990 | Cytoplasm             | NP  | NP  | NP  | 118 |
| 1200184   | stimulator of TAR RNA binding                          | 57803  | P50991 | Cytoplasm             | NP  | NP  | 117 | NP  |
| 34147513  | Ras-related protein Rab-7a                             | 23475  | P51149 | Cytoplasm             | 204 | 292 | NP  | 252 |
| 4759012   | Ras-related protein Rab-9A                             | 22823  | P51151 | Cell membrane         | NP  | 82  | NP  | NP  |
| 5454090   | Translocon-associated protein subunit delta            | 18987  | P51571 | Endoplasmic reticulum | NP  | 118 | 131 | 114 |
| 15680023  | B-cell receptor-associated protein 31                  | 27975  | P51572 | Endoplasmic reticulum | 112 | 98  | 86  | 80  |
| 5032137   | Vesicle-associated membrane protein 7                  | 24919  | P51809 | Cytoplasm             | 481 | 131 | NP  | 71  |
| 4504897   | importin subunit alpha-2                               | 57826  | P52292 | Cytoplasm             | NP  | NP  | 141 | NP  |
| 119573109 | coatamer protein complex, subunit alpha, isoform CRA_b | 136721 | P53621 | Cytoplasm             | NP  | NP  | 196 | NP  |
| 6005942   | Transitional endoplasmic reticulum ATPase              | 89266  | P55072 | Cytoplasm             | NP  | 708 | 584 | 561 |
| 224589127 | Transmembrane protein 33                               | 27960  | P57088 | Cell membrane         | NP  | 129 | NP  | NP  |
| 5803165   | Protein transport protein Sec61 subunit beta           | 9968   | P60468 | Endoplasmic reticulum | NP  | 72  | NP  | NP  |
| 467828    | Myosin light polypeptide 6                             | 17601  | P60660 | Cytoplasm             | 99  | NP  | 312 | 116 |
| 4501885   | Actin, cytoplasmic 1                                   | 41710  | P60709 | Cytoplasm             | 471 | NP  | 682 | 562 |
| 4503529   | Eukaryotic initiation factor 4A-I                      | 46125  | P60842 | Cytoplasm             | 118 | 134 | 167 | 178 |

|           |                                                                             |       |        |                       |     |     |     |     |
|-----------|-----------------------------------------------------------------------------|-------|--------|-----------------------|-----|-----|-----|-----|
| 4506697   | 40S ribosomal protein S20                                                   | 13364 | P60866 | Cytoplasm             | 93  | 104 | 88  | 102 |
| 4506127   | ribose-phosphate pyrophosphokinase 1 isoform 1                              | 34812 | P60891 | Cytoplasm             | NP  | NP  | 192 | NP  |
| 4506365   | Ras-related protein Rab-2A                                                  | 23531 | P61019 | Endoplasmic reticulum | NP  | 141 | NP  | NP  |
| 12052826  | Ras-related protein Rab-10                                                  | 22455 | P61026 | Cytoplasm             | 127 | NP  | NP  | 163 |
| 16758368  | Ras-related protein Rab-14                                                  | 23912 | P61107 | Golgi apparatus       | NP  | 112 | NP  | NP  |
| 119612991 | hCG1998718                                                                  | 24786 | P61247 | Cytoplasm             | NP  | NP  | 87  | NP  |
| 12006350  | 60S ribosomal protein L15                                                   | 24145 | P61313 | Cytoplasm             | NP  | NP  | 82  | 81  |
| 4503253   | Dolichyl-diphosphooligosaccharide--protein glycosyltransferase subunit DAD1 | 12489 | P61803 | Endoplasmic reticulum | NP  | 88  | NP  | NP  |
| 460789    | Heterogeneous nuclear ribonucleoprotein K                                   | 51040 | P61978 | Cytoplasm             | 104 | NP  | 224 | 195 |
| 9507245   | 14-3-3 protein gamma                                                        | 28285 | P61983 | Cytoplasm             | 262 | 256 | 105 | 256 |
| 4506743   | 40S ribosomal protein S8                                                    | 24190 | P62241 | Cytoplasm             | 168 | 111 | 198 | 145 |
| 4506691   | 40S ribosomal protein S16                                                   | 16435 | P62249 | Cytoplasm             | 105 | 126 | 110 | 114 |
| 5803225   | 14-3-3 protein epsilon                                                      | 29155 | P62258 | Cytoplasm             | 707 | 895 | 161 | 552 |
| 5032051   | 40S ribosomal protein S14                                                   | 16263 | P62263 | Cytoplasm             | 117 | 141 | 92  | 103 |
| 4506701   | 40S ribosomal protein S23                                                   | 15798 | P62266 | Cytoplasm             | 75  | NP  | 89  | NP  |
| 6755368   | 40S ribosomal protein S18                                                   | 17708 | P62270 | Cytoplasm             | 194 | 184 | 184 | 168 |
| 4506681   | 40S ribosomal protein S11                                                   | 18419 | P62280 | Cytoplasm             | 82  | 134 | 152 | 113 |
| 1526426   | 26S protease regulatory subunit 10B                                         | 44133 | P62333 | Cytoplasm             | NP  | 72  | NP  | 68  |
| 4506661   | 60S ribosomal protein L7a                                                   | 29977 | P62424 | Cytoplasm             | NP  | NP  | 109 | NP  |
| 337930    | 40S ribosomal protein S4, X isoform                                         | 27386 | P62701 | Cytoplasm             | 134 | 188 | 267 | 163 |

|           |                                                                  |       |        |                 |     |     |     |     |
|-----------|------------------------------------------------------------------|-------|--------|-----------------|-----|-----|-----|-----|
| 306549    | homology to rat ribosomal protein L23, partial                   | 16730 | P62750 | Cytoplasm       | NP  | NP  | 106 |     |
| 337514    | 40S ribosomal protein S6                                         | 28614 | P62753 | Cytoplasm       | NP  | 77  | 142 | 120 |
| 4758988   | Ras-related protein Rab-1A                                       | 22663 | P62820 | Golgi apparatus | 187 | 217 | 127 | 235 |
| 4506605   | 60S ribosomal protein L23                                        | 14856 | P62829 | Cytoplasm       | 143 | 210 | 183 | 179 |
| 119579121 | hCG27283                                                         | 13014 | P62854 | Cytoplasm       | NP  | NP  | 83  | NP  |
| 6680045   | Guanine nucleotide-binding protein G(I)/G(S)/G(T) subunit beta-1 | 37353 | P62874 | Cell membrane   | NP  | 105 | NP  | 113 |
| 1655596   | ribosomal protein L31                                            | 14084 | P62899 | Cytoplasm       | NP  | NP  | 67  | NP  |
| 4506635   | 60S ribosomal protein L32                                        | 15850 | P62910 | Cytoplasm       | NP  | NP  | 91  | NP  |
| 291463380 | Peptidyl-prolyl cis-trans isomerase A                            | 18537 | P62937 | Cytoplasm       | 86  | 192 | 115 | 127 |
| 4507953   | 14-3-3 protein zeta/delta                                        | 27728 | P63104 | Cytoplasm       | 515 | 564 | 169 | 449 |
| 5174447   | Guanine nucleotide-binding protein subunit beta-2-like 1         | 35055 | P63244 | Cell membrane   | 92  | 106 | 220 | 111 |
| 181486    | Nuclease-sensitive element-binding protein 1                     | 39954 | P67809 | Cytoplasm       | 143 | 99  | 112 | 133 |
| 10441386  | TPM4-ALK fusion oncoprotein type 2                               | 27513 | P67936 | Cytoplasm       | NP  | NP  | 84  | NP  |
| 31092     | Elongation factor 1-alpha 1                                      | 50095 | P68104 | Cytoplasm       | 183 | 218 | 182 | 203 |
| 4501881   | Actin, alpha skeletal muscle                                     | 42024 | P68133 | Cytoplasm       | 359 | NP  | NP  | NP  |
| 5174735   | Tubulin beta-4B chain                                            | 49799 | P68371 | Cytoplasm       | 89  | 573 | 185 | 552 |
| 5453603   | T-complex protein 1 subunit beta isoform 1                       | 57452 | P78371 | Cytoplasm.      | NP  | NP  | NP  | 97  |
| 4506619   | 60S ribosomal protein L24                                        | 17768 | P83731 | Cytoplasm       | NP  | NP  | 91  | NP  |
| 1065361   | ADP-ribosylation factor 1                                        | 20553 | P84077 | Golgi apparatus | NP  | 68  | 71  | NP  |

|           |                                                    |        |        |                       |     |     |     |     |
|-----------|----------------------------------------------------|--------|--------|-----------------------|-----|-----|-----|-----|
| 4502209   | ADP-ribosylation factor 5                          | 20517  | P84085 | Golgi apparatus       | 90  | 97  | 78  | 82  |
| 119619805 | hCG39240, isoform CRA_a                            | 20120  | P84098 | Cytoplasm             | NP  | NP  | 91  | NP  |
| 7106439   | Tubulin beta-5 chain                               | 49639  | P99024 | Cytoplasm             | 393 | NP  | 615 | 611 |
| 4758012   | Clathrin heavy chain 1                             | 191493 | Q00610 | Cytoplasm             | 110 | 70  | 426 | 172 |
| 11415026  | 60S ribosomal protein L18a                         | 20749  | Q02543 | Cytoplasm             | NP  | NP  | 79  | NP  |
| 2624694   | Single-stranded DNA-binding protein, mitochondrial | 15186  | Q04837 | Cytoplasm             | 459 | NP  | NP  | NP  |
| 437363    | 14-3-3 protein eta                                 | 28172  | Q04917 | Cytoplasm             | 196 | 160 | NP  | 138 |
| 4505591   | Peroxiredoxin-1                                    | 22096  | Q06830 | Cytoplasm             | 182 | 197 | 138 | 175 |
| 4506607   | 60S ribosomal protein L18                          | 21621  | Q07020 | Cytoplasm             | 75  | NP  | 203 | 86  |
| 63102283  | Cytoskeleton-associated protein 4                  | 58171  | Q07065 | Endoplasmic reticulum | NP  | NP  | NP  | 198 |
| 89574029  | ATP synthase subunit beta                          | 48083  | Q0QEN7 | Golgi apparatus       | 349 | NP  | NP  | NP  |
| 5803023   | Vesicular integral-membrane protein VIP36          | 40203  | Q12907 | Endoplasmic reticulum | NP  | 74  | 77  | 70  |
| 5453549   | Peroxiredoxin-4                                    | 30521  | Q13162 | Cytoplasm             | NP  | 103 | 85  | 93  |
| 1060888   | 26S proteasome non-ATPase regulatory subunit 2     | 100122 | Q13200 | Cytoplasm             | NP  | 75  | NP  | NP  |
| 1805280   | alpha II spectrin                                  | 284891 | Q13813 | Cytoplasm             | NP  | NP  | 87  | NP  |
| 181914    | Heterogeneous nuclear ribonucleoprotein D0         | 35801  | Q14103 | Endoplasmic reticulum | 96  | NP  | NP  | NP  |
| 119618619 | Malectin                                           | 40066  | Q14165 | Endoplasmic reticulum | 96  | 120 | NP  | 122 |
| 19923142  | importin subunit beta-1                            | 97108  | Q14974 | Cytoplasm             | NP  | NP  | 656 | NP  |
| 7661010   | ER membrane protein complex subunit 2              | 24811  | Q15006 | Endoplasmic           | 125 | ND  | ND  | ND  |

|           |                                               |        |        |                       |     |     |     |     |
|-----------|-----------------------------------------------|--------|--------|-----------------------|-----|-----|-----|-----|
| 7001910   | ER membrane protein complex subunit 2         | 54811  | Q15000 | reticulum             | 155 | NP  | NP  | NP  |
| 1710248   | protein disulfide isomerase-related protein 5 | 46170  | Q15084 | Endoplasmic reticulum | NP  | NP  | 211 | 205 |
| 22477159  | Protein transport protein Sec23A              | 86109  | Q15436 | Endoplasmic reticulum | NP  | 96  | NP  | NP  |
| 392890    | drebrin E2                                    | 71381  | Q16643 | Cytoplasm             | NP  | NP  | 107 | NP  |
| 84569966  | Unknown (protein for MGC:131531)              | 21747  | Q2NKY6 | Cytoplasm             | NP  | NP  | 74  | NP  |
| 126723336 | Prohibitin 2                                  | 33276  | Q3V235 | Cytoplasm             | 176 | NP  | NP  | NP  |
| 68533125  | ACLY variant protein                          | 124477 | Q4LE36 | Cytoplasm             | NP  | 81  | 69  | NP  |
| 62897773  | Ribosomal protein S5 variant                  | 22950  | Q53G25 | Cytoplasm             | NP  | NP  | NP  | 130 |
| 62897625  | Beta actin variant                            | 41738  | Q53G99 | Cytoplasm             | 632 | 469 | 849 | 567 |
| 62897409  | Beta actin variant                            | 41696  | Q53GK6 | Cytoplasm             | NP  | 554 | 106 | NP  |
| 7705855   | Estradiol 17-beta-dehydrogenase 12            | 34302  | Q53GQ0 | Endoplasmic reticulum | NP  | 82  | NP  | 159 |
| 62896547  | B-cell receptor-associated protein 31 variant | 27944  | Q53HT6 | Cytoplasm             | 76  | NP  | NP  | NP  |
| 62089222  | Heat shock 70kDa protein 1A variant           | 77448  | Q59EJ3 | Endoplasmic reticulum | 446 | NP  | NP  | NP  |
| 62088648  | Tumor rejection antigen                       | 65912  | Q59FC6 | Endoplasmic reticulum | 140 | 252 | NP  | 145 |
| 62087780  | ribosomal protein L21 variant                 | 18879  | Q59GK9 | Cytoplasm             | NP  | NP  | NP  | NP  |
| 194382322 | ER membrane protein complex subunit 4         | 15079  | Q5J8M3 | Cell membrane         | NP  | 89  | NP  | NP  |
| 122891870 | Melanoma inhibitory activity protein 3        | 213570 | Q5JRA6 | Endoplasmic reticulum | NP  | 94  | NP  | NP  |
| 54300702  | Ubiquitin C splice variant                    | 17142  | Q5UGI3 | Cytoplasm             | NP  | 229 | NP  | NP  |

|           |                                                                        |        |        |                       |     |     |     |     |
|-----------|------------------------------------------------------------------------|--------|--------|-----------------------|-----|-----|-----|-----|
| 55665780  | Tropomyosin 3                                                          | 27158  | Q5VU59 | Cytoplasm             | NP  | 82  | NP  | NP  |
| 5729875   | PGRMC1 protein                                                         | 21658  | Q6IB11 | Cell membrane         | 185 | NP  | 112 | NP  |
| 4200241   | STX12 protein                                                          | 30859  | Q6LEU0 | Cell membrane         | NP  | 143 | NP  | 98  |
| 45829841  | SLC25A5 protein                                                        | 35271  | Q6NVC0 | Cell membrane         | 210 | 286 | 228 | NP  |
| 45501009  | CKAP4 protein                                                          | 67777  | Q6NWZ1 | Cytoplasm             | 163 | 197 | 187 | NP  |
| 457262    | Nuclease sensitive element binding protein-1                           | 34650  | Q7KZ24 | Cytoplasm             | 95  | NP  | NP  | NP  |
| 799177    | 100 kDa coactivator                                                    | 99628  | Q7KZF4 | Cytoplasm             | 83  | 74  | 118 | NP  |
| 20336290  | putative ATP-dependent RNA helicase DHX30 isoform 2                    | 129357 | Q7L2E3 | Cytoplasm             | NP  | 74  | 87  | NP  |
| 5729999   | Ras-related GTP-binding protein A                                      | 36543  | Q7L523 | Cytoplasm             | NP  | NP  | NP  | NP  |
| 27477136  | Zinc finger CCCH-type antiviral protein 1                              | 101367 | Q7Z2W4 | Cytoplasm             | NP  | 92  | NP  | 76  |
| 119586864 | Transmembrane protein 55B                                              | 22014  | Q86T03 | Cell membrane         | NP  | 71  | NP  | NP  |
| 30582727  | Dihydropyrimidinase-like 2                                             | 66975  | Q86U75 | Cytoplasm             | NP  | 118 | NP  | NP  |
| 119631364 | DnaJ homolog subfamily C member 10                                     | 94501  | Q8IXB1 | Endoplasmic reticulum | NP  | 75  | NP  | NP  |
| 21755136  | Transmembrane protein 192                                              | 30469  | Q8IY95 | Cell membrane         | NP  | 132 | NP  | NP  |
| 56605994  | CDGSH iron-sulfur domain-containing protein 2                          | 15268  | Q8N5K1 | Endoplasmic reticulum | NP  | 72  | NP  | NP  |
| 22095331  | ER membrane protein complex subunit 1                                  | 111689 | Q8N766 | Endoplasmic reticulum | 120 | 128 | NP  | 101 |
| 19263767  | Similar to cytoskeleton-associated protein 4                           | 62023  | Q8TB01 | Cytoplasm             | 144 | 239 | NP  | 165 |
| 20578410  | Dolichyl-diphosphooligosaccharide--protein glycosyltransferase subunit | 92614  | Q8T0B  | Endoplasmic           | 125 | 122 | 100 | 161 |

|          |                                                          |        |        |                       |     |     |     |     |
|----------|----------------------------------------------------------|--------|--------|-----------------------|-----|-----|-----|-----|
| 50578410 | STT3B                                                    | 75014  | Q81CJ2 | reticulum             | 125 | 125 | 109 | 101 |
| 18676757 | Probable glutathione peroxidase 8                        | 23894  | Q8TED1 | Cell membrane         | NP  | 99  | NP  | 75  |
| 5138928  | vesicle transport-related protein                        | 72434  | Q8WVM8 | Cytoplasm             | NP  | NP  | 74  | NP  |
| 1518259  | GPI-anchor transamidase                                  | 45358  | Q92643 | Endoplasmic reticulum | NP  | 76  | NP  | NP  |
| 4680651  | GPI transamidase component PIG-T                         | 65353  | Q969N2 | Endoplasmic reticulum | NP  | NP  | NP  | 69  |
| 40254924 | Leucine-rich repeat-containing protein 59                | 34909  | Q96AG4 | Endoplasmic reticulum | NP  | 79  | NP  | 75  |
| 21361454 | pyrroline-5-carboxylate reductase 2                      | 33616  | Q96C36 | Cytoplasm             | NP  | NP  | 170 | NP  |
| 4240263  | FAS-associated factor 2                                  | 52388  | Q96CS3 | Cytoplasm             | NP  | 72  | 88  | 106 |
| 13027602 | DDRGK domain-containing protein 1                        | 35589  | Q96HY6 | Endoplasmic reticulum | NP  | NP  | NP  | 82  |
| 7022978  | Vacuolar protein sorting-associated protein 35           | 91551  | Q96QK1 | Cytoplasm             | 94  | 150 | 83  | 139 |
| 25777600 | 26S proteasome non-ATPase regulatory subunit 1 isoform 1 | 105769 | Q99460 | Proteasome            | NP  | NP  | 96  | NP  |
| 5453607  | T-complex protein 1 subunit eta isoform a                | 59329  | Q99832 | Cytoplasm             | NP  | NP  | 75  | NP  |
| 13542987 | Similar to ribosomal protein S8                          | 9277   | Q9BS10 | Cytoplasm             | NP  | 105 | NP  | NP  |
| 3882215  | Extended synaptotagmin-1                                 | 119783 | Q9BSJ8 | Cell membrane         | 180 | 272 | 138 | 244 |
| 34392    | RPS2 protein                                             | 24191  | Q9BSW5 | Cytoplasm             | NP  | NP  | NP  | 128 |
| 12698013 | KIAA1734 protein                                         | 143387 | Q9C0C9 | Cytoplasm             | NP  | NP  | 130 | NP  |
| 6048243  | Toll-interacting protein                                 | 30191  | Q9H0E2 | Cytoplasm             | NP  | 78  | NP  | NP  |
| 22761454 | Magnesium transporter protein 1                          | 38011  | Q9H0U3 | Cell membrane         | NP  | NP  | NP  | 71  |

|          |                                                                         |        |        |                       |     |     |     |     |
|----------|-------------------------------------------------------------------------|--------|--------|-----------------------|-----|-----|-----|-----|
| 22761456 | Thioredoxin-related transmembrane protein 1                             | 31743  | Q9H3N1 | Endoplasmic reticulum | 83  | 135 | 91  | 114 |
| 10436857 | cDNA: FLJ20897 fis, clone ADKA03573                                     | 71374  | Q9H7G6 | Cytoplasm             | NP  | 77  | 75  | NP  |
| 9802306  | DNA-binding protein TAXREB107                                           | 32871  | Q9HBB3 | Cytoplasm             | NP  | NP  | 214 | NP  |
| 11275389 | Stromal cell-derived factor 2-like protein 1                            | 23497  | Q9HCN8 | Endoplasmic reticulum | 115 | 125 | 117 | 122 |
| 9858861  | Probable cation-transporting ATPase 13A1                                | 121032 | Q9HD20 | Cell membrane         | NP  | 70  | NP  | NP  |
| 1581615  | Oligosaccharyltransferase complex subunit OSTC                          | 46216  | Q9NRP0 | Cell membrane         | 311 | 298 | 152 | 338 |
| 7019854  | DnaJ homolog subfamily B member 12                                      | 41760  | Q9NXW2 | Cell membrane         | NP  | NP  | NP  | 107 |
| 3329386  | Very-long-chain enoyl-CoA reductase                                     | 36038  | Q9NZ01 | Endoplasmic reticulum | 90  | 69  | NP  | 76  |
| 6735452  | Very-long-chain (3R)-3-hydroxyacyl-[acyl-carrier protein] dehydratase 3 | 43515  | Q9P035 | Endoplasmic reticulum | 153 | 257 | 106 | 135 |
| 94721250 | Vesicle-associated membrane protein-associated protein A                | 32593  | Q9P0L0 | Endoplasmic reticulum | NP  | 91  | NP  | NP  |
| 2935281  | 7-dehydrocholesterol reductase                                          | 54480  | Q9UBM7 | Endoplasmic reticulum | 91  | 120 | NP  | 97  |
| 7706495  | DnaJ homolog subfamily B member 11                                      | 40489  | Q9UBS4 | Endoplasmic reticulum | 180 | 120 | 102 | 140 |
| 6841440  | Stomatin-like protein 2                                                 | 37122  | Q9UJZ1 | Cell membrane         | 72  | NP  | 74  | 67  |
| 3283893  | Transmembrane and coiled-coil domain-containing protein 1               | 25934  | Q9UM00 | Endoplasmic reticulum | NP  | 87  | NP  | NP  |
| 4028622  | chaperonin 10-related protein                                           | 10289  | Q9UNM1 | Cytoplasm             | NP  | NP  | 171 | NP  |



|          |                                                   |       |        |                       |     |     |     |     |
|----------|---------------------------------------------------|-------|--------|-----------------------|-----|-----|-----|-----|
| 7549793  | transducin beta-like protein 2 precursor          | 49766 | Q9Y4P3 | Unknown               | 110 | 193 | 150 | NP  |
| 38649415 | Signal recognition particle receptor subunit beta | 29698 | Q9Y5M8 | Endoplasmic reticulum | NP  | 181 | NP  | 92  |
| 11559929 | Coatomer subunit gamma-1                          | 97655 | Q9Y678 | Cytoplasm             | 93  | 119 | NP  | 118 |
| 5410278  | Ancient ubiquitous protein 1                      | 45768 | Q9Y679 | Endoplasmic reticulum | NP  | 70  | NP  | NP  |

Table S3

a

| hα4 Concatamer Construct | HS EC <sub>50</sub> (μM) | HS Max Response | LS EC <sub>50</sub> (μM) | LS Max Response |
|--------------------------|--------------------------|-----------------|--------------------------|-----------------|
| α4R336C(α4β2)β2          | 1.70±0.69                | 0.92±0.12       | 220.0±154                | 2.80±0.12       |
| α4R336C(α4β2)α4          | 2.5±1.30                 | 0.53±0.10       | 210±703                  | 1.16±0.10       |
| α4P451L(α4β2)β2          | 3.55±0.76                | 1.14±0.04       | --                       | --              |
| α4P451L(α4β2)α4          | 1.63±0.96                | 0.38±0.06       | 331.4±59.88              | 1.76±0.07       |
| α4R487Q(α4β2)β2          | 2.86±0.50                | 1.24±0.03       | --                       | --              |
| α4R487Q(α4β2)α4          | --                       | --              | 108.3±35.4               | 2.0±0.15        |

b

| hα4 Concatamer Construct | HS EC <sub>50</sub> (μM) | HS Max Response | LS EC <sub>50</sub> (μM) | LS Max Response |
|--------------------------|--------------------------|-----------------|--------------------------|-----------------|
| α4R336C(α4β2)β2          | 0.43±0.60                | 0.52±0.11       | --                       | --              |
| α4R336C(α4β2)α4          | --                       | --              | 10.47±2.17               | 1.13±0.05       |
| α4P451L(α4β2)β2          | 0.23±0.11                | 0.30±0.02       | --                       | --              |
| α4P451L(α4β2)α4          | --                       | --              | 5.8±1.06                 | 0.92±0.04       |
| α4R487Q(α4β2)β2          | 0.35±0.10                | 0.31±0.01       | --                       | --              |
| α4R487Q(α4β2)α4          | --                       | --              | 13.50±2.37               | 1.29±0.06       |

## Section S1:

1. Main effect of [ $\alpha$ 4 cDNA]: One-way ANOVA, [ $\alpha$ 4 cDNA]:  $\alpha$ 4:  $F_{(2,11)}=251.2$ ,  $p<0.0009$ ;  $\alpha$ 4R336C:  $F_{(2,11)}=183.4$ ,  $p<0.0009$ ;  $\alpha$ 4P451L:  $F_{(2,11)}=20.5$ ,  $p<0.0009$ ;  $\alpha$ 4R487Q:  $F_{(2,11)}=161.1$ ,  $p<0.0009$
2. Main effect of h $\alpha$ 4 Variant on  $\frac{1}{2}$  max [ $\alpha$ 4 cDNA]: One-way ANOVA,  $\frac{1}{2}$ max [cDNA]:  $F_{(3,15)}=1.71$ ,  $p=0.22$
3. Main effect of h $\alpha$ 4 Variant on estimated max [ $^3$ H]-epibatidine binding: One-way ANOVA Max Expression:  $F_{(3,15)}=5.2$ ,  $p=0.016$
4. Main effect of h $\alpha$ 4 Variant on [ $^3$ H]-epibatidine Bmax: One-way ANOVA Bmax:  $F_{(3,11)}=29.14$ ,  $p<0.0009$ ; Dunnett's post-hoc: Bmax: control vs P451L,  $p=0.001$
5. Main Effect of h $\alpha$ 4 Variant on [ $^3$ H]-epibatidine Kd: One-way ANOVA Kd:  $F_{(3,11)}=1.25$ ,  $p=0.35$
6. Main effect of 24hr nicotine treatment on [ $^3$ H]-epibatidine binding: one-way ANOVA, [Nicotine]:  $\alpha$ 4control:  $F_{(5,47)}=7.72$ ,  $p<0.0009$ ;  $\alpha$ 4R336C:  $F_{(5,47)}=19.42$ ,  $p<0.0009$ ;  $\alpha$ 4P451L:  $F_{(5,47)}=13.52$ ,  $p<0.0009$ ;  $\alpha$ 4R487Q:  $F_{(5,47)}=4.22$ ,  $p=0.003$
7. Main effect of h $\alpha$ 4 Variant on estimated max upregulation: one-way ANOVA, MaxUpregulation:  $F_{(3,29)}=0.8$ ,  $p=0.5$
8. Main effect of h $\alpha$ 4 Variant on estimated nicotine EC<sub>50</sub> for upregulation: one-way ANOVA NicEC<sub>50</sub>:  $F_{(3,29)}=1.03$ ,  $p=0.4$
9. Main effect of h $\alpha$ 4 Variant on fold change following 24hr nicotine: one-way ANOVA, Max Fold Change:  $F_{(3,29)}=8.24$ ,  $p=0.001$ ; Dunnett's post-hoc: control vs P451L:  $p=0.002$

## Section S2

1. Main effect of h $\alpha$ 4 Variant on total membrane [ $^3$ H]-epibatidine binding: one-way ANOVA,  $F_{(3,23)}=12.6$ ,  $p<0.0009$ ; Dunnett's post-hoc: control vs P451L:  $p<0.0009$
2. Main effect of h $\alpha$ 4 Variant on plasma membrane binding: one-way ANOVA,  $F_{(3,23)}=1.82$ ,  $p=0.18$
3. Main effect of h $\alpha$ 4 Variant on percent plasma membrane [ $^3$ H]-epibatidine binding: one-way ANOVA,  $F_{(3,23)}=2.81$ ,  $p=0.07$ ; Dunnett's post-hoc control vs P451L:  $p=0.04$
4. Main Effect of nicotine on total and plasma membrane [ $^3$ H]-epibatidine binding: Total Binding, one-way ANOVA:  $\alpha$ 4control  $F_{(1,11)}=98.30$ ,  $p<0.0009$ ;  $\alpha$ 4R336C  $F_{(1,11)}=44.50$ ,  $p<0.0009$ ;  $\alpha$ 4P451L  $F_{(1,11)}=58.50$ ,  $p<0.0009$ ;  $\alpha$ 4R487Q  $F_{(1,11)}=56.10$ ,  $p<0.0009$ ; Surface Receptor Binding, one-way ANOVA:  $\alpha$ 4control  $F_{(1,11)}=22.40$ ,  $p<0.0009$ ;  $\alpha$ 4R336C  $F_{(1,11)}=7.90$ ,  $p=0.02$ ,  $\alpha$ 4P451L  $F_{(1,11)}=154.50$ ,  $p<0.0009$ ;  $\alpha$ 4R487Q  $F_{(1,11)}=60.70$ ,  $p<0.0009$  Main effect of h $\alpha$ 4 Variant on fold change in [ $^3$ H]-epibatidine binding following 24hr nicotine: Total Binding, one-way ANOVA:  $F_{(3,23)}=17.10$ ,  $p<0.0009$ ; Dunnett's post-hoc control vs P451L:  $p<0.0009$ ; Surface Receptor Binding, one-way ANOVA:  $F_{(3,23)}=9.44$ ,  $p<0.0009$ ; Dunnett's post hoc WT vs P451L:  $p=0.007$
